## Standards of Medical Care in Diabetes—2022

- S1 **Introduction**
- S3 **Professional Practice Committee**
- S4 **Summary of Revisions**
- S8 **1. Improving Care and Promoting Health in Populations**  
Diabetes and Population Health  
Tailoring Treatment for Social Context
- S17 **2. Classification and Diagnosis of Diabetes**  
Classification  
Diagnostic Tests for Diabetes  
Type 1 Diabetes  
Prediabetes and Type 2 Diabetes  
Cystic Fibrosis–Related Diabetes  
Posttransplantation Diabetes Mellitus  
Monogenic Diabetes Syndromes  
Pancreatic Diabetes or Diabetes in the Context of Disease of the Exocrine Pancreas  
Gestational Diabetes Mellitus
- S39 **3. Prevention or Delay of Type 2 Diabetes and Associated Comorbidities**  
Lifestyle Behavior Change for Diabetes Prevention  
Pharmacologic Interventions  
Prevention of Vascular Disease and Mortality  
Patient-Centered Care Goals
- S46 **4. Comprehensive Medical Evaluation and Assessment of Comorbidities**  
Patient-Centered Collaborative Care  
Comprehensive Medical Evaluation  
Immunizations  
Assessment of Comorbidities
- S60 **5. Facilitating Behavior Change and Well-being to Improve Health Outcomes**  
Diabetes Self-management Education and Support  
Medical Nutrition Therapy  
Physical Activity  
Smoking Cessation: Tobacco and e-Cigarettes  
Psychosocial Issues
- S83 **6. Glycemic Targets**  
Assessment of Glycemic Control  
Glycemic Goals  
Hypoglycemia  
Intercurrent Illness
- S97 **7. Diabetes Technology**  
General Device Principles  
Blood Glucose Monitoring  
Continuous Glucose Monitoring Devices  
Insulin Delivery
- S113 **8. Obesity and Weight Management for the Prevention and Treatment of Type 2 Diabetes**  
Assessment  
Diet, Physical Activity, and Behavioral Therapy  
Pharmacotherapy  
Medical Devices for Weight Loss  
Metabolic Surgery
- S125 **9. Pharmacologic Approaches to Glycemic Treatment**  
Pharmacologic Therapy for Adults With Type 1 Diabetes  
Surgical Treatment for Type 1 Diabetes  
Pharmacologic Therapy for Adults With Type 2 Diabetes
- S144 **10. Cardiovascular Disease and Risk Management**  
The Risk Calculator  
Hypertension/Blood Pressure Control  
Lipid Management  
Statin Treatment  
Antiplatelet Agents  
Cardiovascular Disease
- S175 **11. Chronic Kidney Disease and Risk Management**  
Chronic Kidney Disease  
Epidemiology of Diabetes and Chronic Kidney Disease  
Assessment of Albuminuria and Estimated Glomerular Filtration Rate  
Diagnosis of Diabetic Kidney Disease  
Staging of Chronic Kidney Disease  
Acute Kidney Injury  
Surveillance  
Interventions
- S185 **12. Retinopathy, Neuropathy, and Foot Care**  
Diabetic Retinopathy  
Neuropathy  
Foot Care
- S195 **13. Older Adults**  
Neurocognitive Function  
Hypoglycemia  
Treatment Goals  
Lifestyle Management  
Pharmacologic Therapy  
Special Considerations for Older Adults With Type 1 Diabetes  
Treatment in Skilled Nursing Facilities and Nursing Homes  
End-of-Life Care
- S208 **14. Children and Adolescents**  
Type 1 Diabetes  
Type 2 Diabetes  
Transition From Pediatric to Adult Care
- S232 **15. Management of Diabetes in Pregnancy**  
Diabetes in Pregnancy  
Preconception Counseling  
Glycemic Targets in Pregnancy  
Management of Gestational Diabetes Mellitus  
Management of Preexisting Type 1 Diabetes and Type 2 Diabetes in Pregnancy  
Preeclampsia and Aspirin  
Pregnancy and Drug Considerations  
Postpartum Care
- S244 **16. Diabetes Care in the Hospital**  
Hospital Care Delivery Standards  
Glycemic Targets in Hospitalized Patients  
Bedside Blood Glucose Monitoring  
Glucose-Lowering Treatment in Hospitalized Patients  
Hypoglycemia

This issue is freely accessible online at [https://diabetesjournals.org/care/issue/45/Supplement\\_1](https://diabetesjournals.org/care/issue/45/Supplement_1).

Keep up with the latest information for *Diabetes Care* and other ADA titles via Facebook (/ADAPublications) and Twitter (@ADA\_Pubs).

---

Medical Nutrition Therapy in the Hospital  
Self-management in the Hospital  
Standards for Special Situations  
Transition From the Hospital to the Ambulatory  
Setting  
Preventing Admissions and Readmissions

**S254 17. Diabetes Advocacy**  
Advocacy Statements

**S256 Disclosures**

**S259 Index**

---
